# Supplementary material for: Low-Cost Carrier Passengers’ Willingness to Pay for the Seat Preselection Service: A Case Study on the Taiwan-Japan Route
Source: Hindawi journal article supplement (doi:10.1155/2021/6699270), 2021-02-10
Supplement: f1 [file 6699270.f1.pdf]

## Appendix

No. : Interviewer Name : Date : Terminal :

Dear Sir/Madam:

Thank you for your participation in this survey. The purpose of our survey is to investigate the LCC passengers' willingness to pay for seat pre-selection service. It is strictly for the use of academic research, and your personal information provided is kept a secret from the public. Have a nice and safe flight.

Department of Civil Engineering  
National Chi Nan University

### Part One: Personal Information

1. **Gender** : Male Female
2. **Marital status** : Married Not married
3. **Education** : Senior high school(under) Undergraduate Graduate (above)
4. **Age**: 8-20 21-30 31-40 41-50 51-60  
61-64 above 65
5. **Occupation**: \_\_\_\_\_
6. **Personal income(NT. dollars)**:  
 5,000 5,001-10,000 10,001-20,000 20,001-40,000  
 40,001-60,000 60,001-80,000 80,001-100,000 100,001-120,000  
 120,001-140,000 140,001-160,000 160,001-180,000 180,001-200,000  
 200,001 (above)

**Part Two: Travel characteristics**

**7. How frequent do you travel abroad annually (one time means a round trip)?**

First time    1-2    3-6    7-10    11 (above)

**8. The purpose of this trip ?**

business    tourism    visiting    returning home    study    others \_\_\_\_\_

**9. The airline that you are taking this time ?**

Jetstar    Tigerair    Peach Aviation    Vanilla Air    Scoot    V air    others \_\_\_\_\_

**10. Reasons for taking this airline? (choose two)**  price is cheaper    more incentives    good

service    dense frequency    suitable flight scheduling    high punctuation    others \_\_\_\_\_

**11. The destination of this trip?**    Tokyo-Narita    Osaka    Tokyo-Haneda    others \_\_\_\_\_

**12. The cabin class of this trip?**    Economy class    Business class    First class

**13. Who sponsors the ticket fee for this trip?**    yourself    company    friend    family  

others \_\_\_\_\_

**14. Are you a member of airline company?**    yes, I am \_\_\_\_\_ airline membership  

no

**15. What determines your decision of buying the ticket?**

myself    travel agent    network words of mouth    advertisement    others \_\_\_\_\_

**16. How many people (including yourself) \_\_\_\_\_**

**17. Please fill in the needed information in the following table.**

|                          |                |                                                                               |                                                              |
|--------------------------|----------------|-------------------------------------------------------------------------------|--------------------------------------------------------------|
| <b>Luggage</b>           |                | <input type="checkbox"/> none <input type="checkbox"/> carry-on luggage _____ | <b>Airline ticket price<br/>(one way, including<br/>tax)</b> |
|                          |                | <input type="checkbox"/> no. of check-in luggage(s) _____                     |                                                              |
| <b>Added<br/>service</b> | <b>Luggage</b> | <input type="checkbox"/> none                                                 |                                                              |
|                          |                | <input type="checkbox"/> yes, _____ piece(s) _____ kg(s), _____ dollars       |                                                              |

|                            |                           |                                                                           |  |
|----------------------------|---------------------------|---------------------------------------------------------------------------|--|
|                            | <b>Seat pre-selection</b> | <input type="checkbox"/> none <input type="checkbox"/> yes, _____ dollars |  |
|                            | <b>Meals</b>              | <input type="checkbox"/> none <input type="checkbox"/> yes, _____ dollars |  |
| <b>Total added charges</b> |                           | _____NTD                                                                  |  |

**Part Three : Senarios**

1. Assuming the trip purpose remains the same, are you willing to purchase the service of seat pre-selection ?

|                              |                                                                                                                                |
|------------------------------|--------------------------------------------------------------------------------------------------------------------------------|
| <input type="checkbox"/> yes | (go to question 2)                                                                                                             |
| <input type="checkbox"/> no  | Reasons? <input type="checkbox"/> no need <input type="checkbox"/> need more illustration <input type="checkbox"/> others_____ |

2. Are you willing to pay for the reference price listed in the table for different seat options? In the last column, please fill in the highest price you are willing to pay for all options.

| price(NTD) |                                                |                           |                                                   |                          |                           |
|------------|------------------------------------------------|---------------------------|---------------------------------------------------|--------------------------|---------------------------|
| No         | Options                                        | Reference price (one-way) | willing                                           | Not willing              | Highest WTP (can be zero) |
| 1.         | Standard seats                                 | 150                       | <input type="checkbox"/>                          | <input type="checkbox"/> |                           |
| 2.         | Front seats<br>(front rows 2-6)                | 300                       | <input type="checkbox"/>                          | <input type="checkbox"/> |                           |
| 3.         | Spacious seats<br>(more space)                 | 600                       | <input type="checkbox"/>                          | <input type="checkbox"/> |                           |
| 4.         | Neighbor seats<br>(at most two neighbor seats) | 450<br>/seat              | <input type="checkbox"/><br>_____<br>more seat(s) | <input type="checkbox"/> |                           |

~Thank you~
